# Supplementary material
Source: PubMed Central journal article supplement (PMC3927790)
Supplement: NIHMS549693-supplement-Figure_S1.pdf [file NIHMS549693-supplement-Figure_S1.pdf]

Supporting information

Crystal structure of the N-terminal domain of EccA<sub>1</sub> ATPase from the ESX-1 secretion system of *Mycobacterium tuberculosis*

Jonathan M. Wagner, Timothy J. Evans, Konstantin V. Korotkov

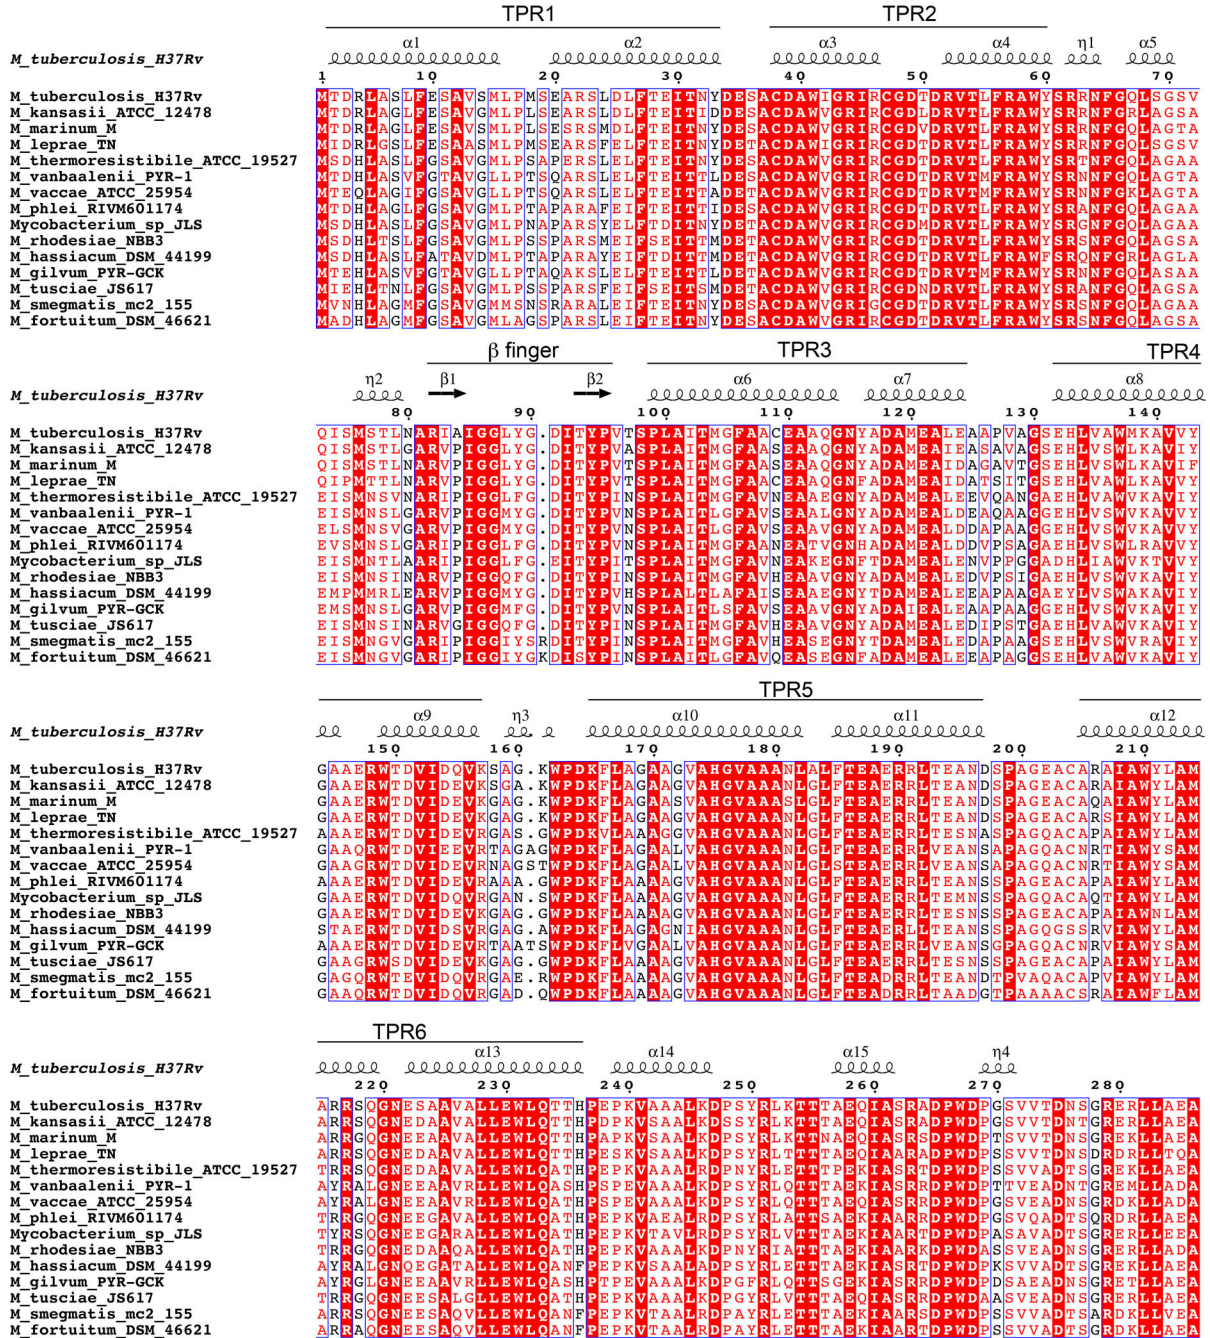

Figure S1 (continues on the next page)

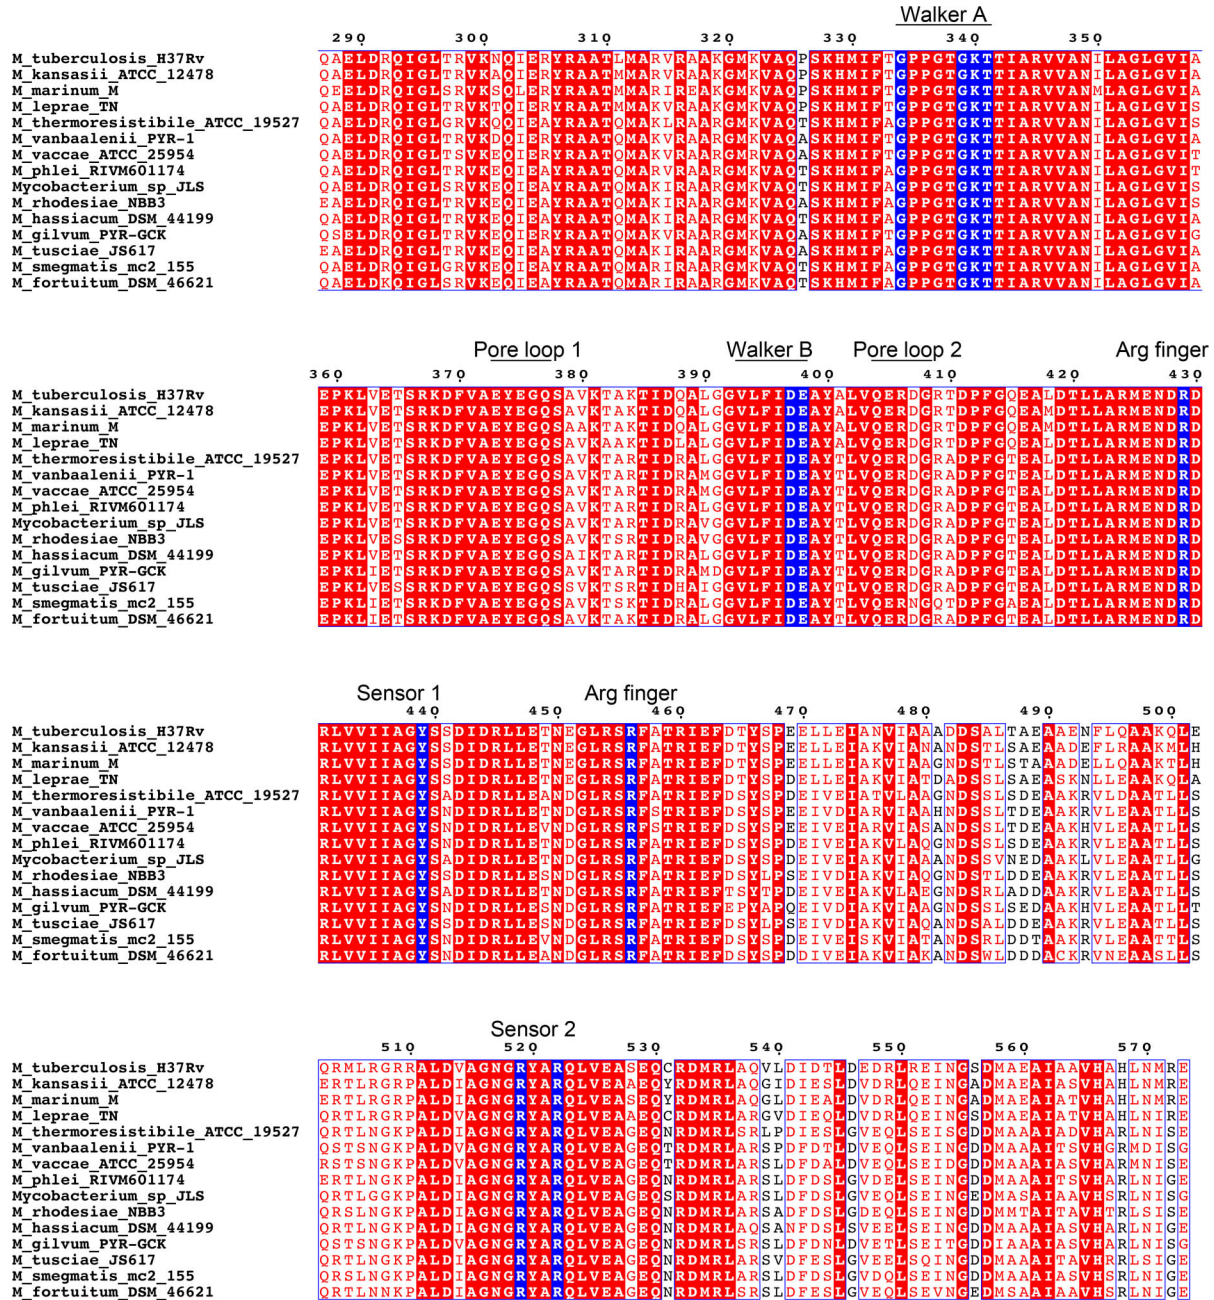

**Figure S1**

Family sequence alignment of EccA<sub>1</sub> homologs. Representative members of EccA<sub>1</sub> family from mycobacteria are included in the alignment. Sequences with high sequence identity (>98%) are excluded. The secondary structure elements and TPR motifs of *M. tuberculosis* EccA<sub>1</sub> are indicated above the sequences. The conserved residues from key elements of AAA+ domain are highlighted in blue and are indicated above the sequences.
